# Supplementary material for: Defective CFTR- β-catenin interaction promotes NF-κB nuclear translocation and intestinal inflammation in cystic fibrosis
Source: PubMed Central journal article supplement (PMC5325423; doi:10.18632/oncotarget.11747), 2016-08-31
Supplement: oncotarget-07-64030-s001.pdf [file oncotarget-07-64030-s001.pdf]

## Defective CFTR- $\beta$ -catenin interaction promotes NF- $\kappa$ B nuclear translocation and intestinal inflammation in cystic fibrosis

### Supplementary Materials

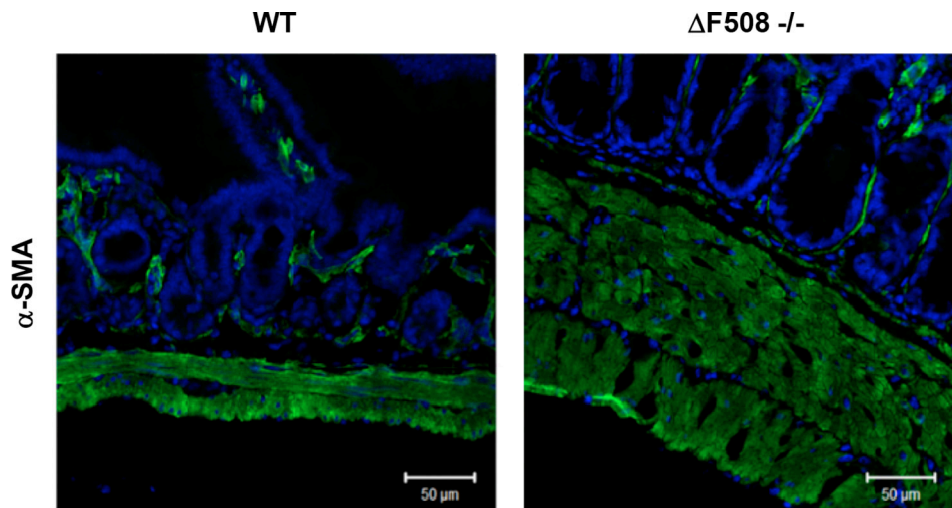

**Supplementary Figure S1: Fluorescent immunostaining of  $\alpha$ -SMA shows significant increase of the thickness of smooth muscle layer in  $\Delta F508$  mouse intestine.** Green color:  $\alpha$ -SMA (anti-alpha smooth muscle actin, 1:100, ab5694, Abcam); blue color: DAPI; scale bar: 50  $\mu$ m).

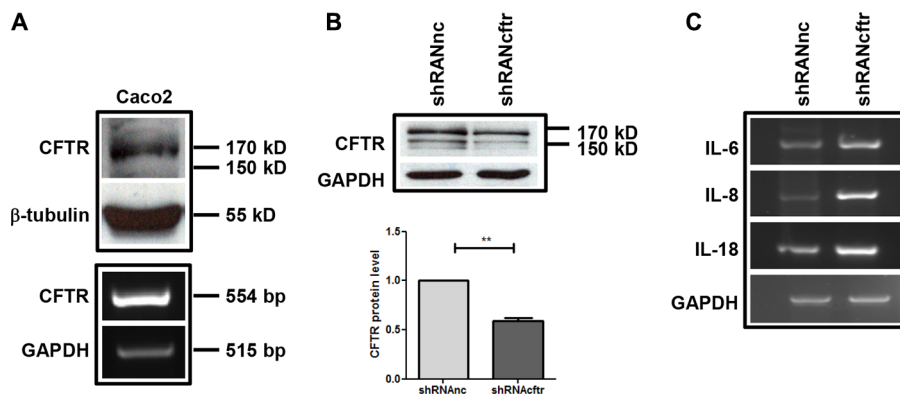

**Supplementary Figure S2: (A)** CFTR is endogenously expressed in Caco-2 cells. upper panel: western blot of CFTR and tubulin in Caco-2 cells; lower panel: RT-PCR results show CFTR mRNA expression in Caco-2 cells. **(B)** Western blot shows CFTR knock down by transfection of shRNA in Caco-2 cells. Quantification data was resulted from three independent experiments **(C)** RT-PCR results show increased mRNA levels of IL6, IL8 and IL18 in Caco-2 cells with CFTR knockdown.

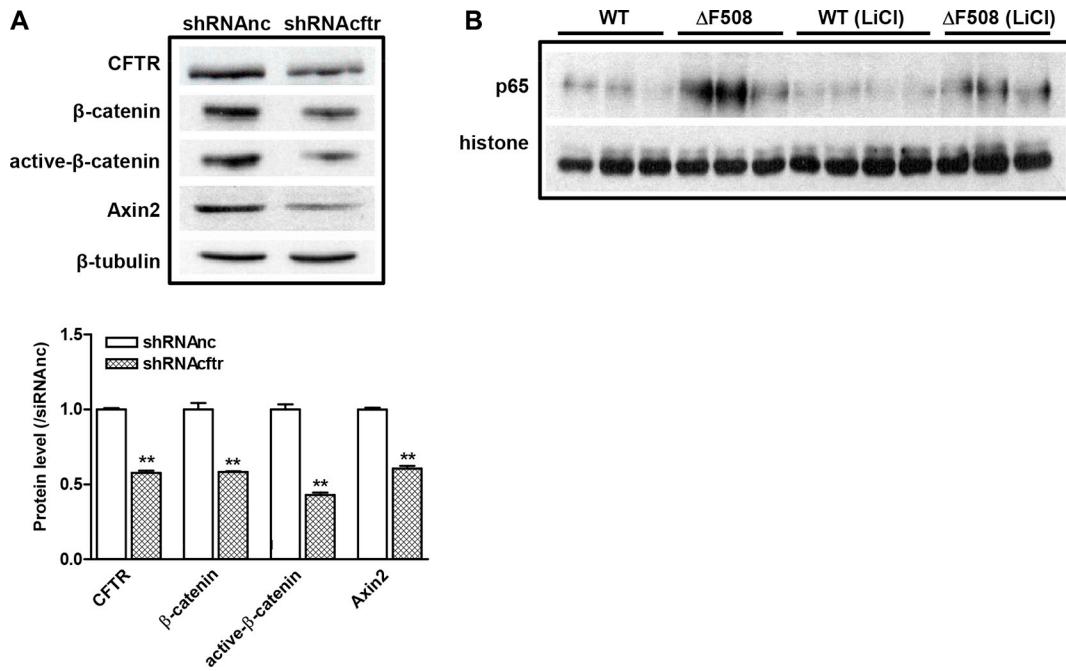

**Supplementary Figure S3:** (A) Upper panel: western blot shows down regulation of  $\beta$ -catenin, active- $\beta$ -catenin and Axin2 in Caco-2 cells after CFTR knockdown. Lower panel: bar chart shows semi-quantitative analysis of western results of  $\beta$ -catenin, active- $\beta$ -catenin and Axin2 in CFTR knock down Caco-2 cells. (B) LiCl treatment reverses the increase of NF $\kappa$ B p65 nucleus translocation in DF508 mouse intestine. WT or DF508 mice are treated with LiCl (200 mg/kg/day) for 9 days. Nucleus fraction of mouse small intestine is extracted. Western blot shows increased NF $\kappa$ B p65 nucleus translocation in DF508 mouse intestine, which can be reversed by LiCl treatment.

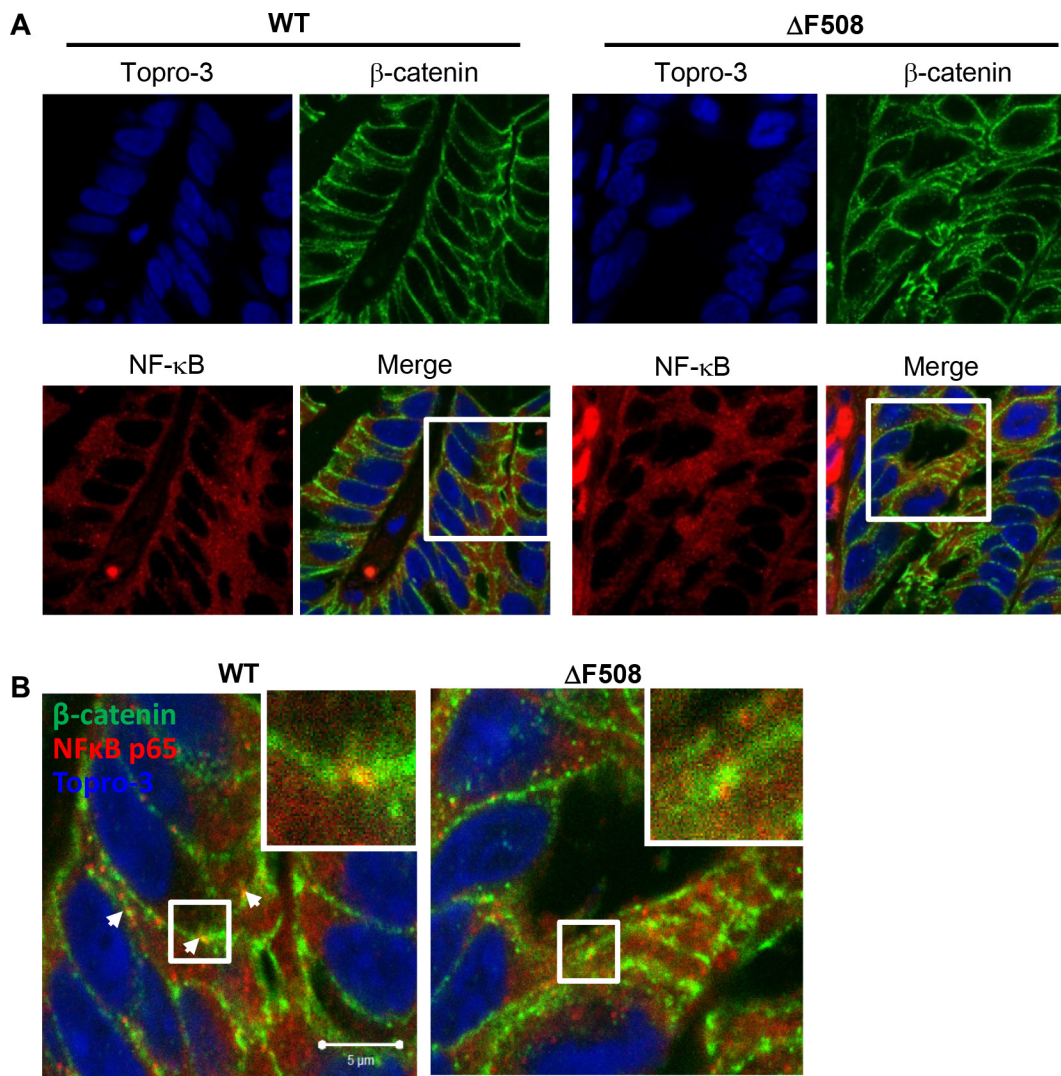

**Supplementary Figure S4:** (A) Immunofluorescence staining of  $\beta$ -catenin and NF- $\kappa$ B in WT and  $\Delta F508$ *cftr*<sup>-/-</sup> mouse small intestine, scale bar = 10  $\mu$ M (B)  $\beta$ -catenin interacts with NF- $\kappa$ B in WT but not  $\Delta F508$ *cftr*<sup>-/-</sup> mouse intestine. Squared area captured at A is enlarged in B. scale bar: 5  $\mu$ m.

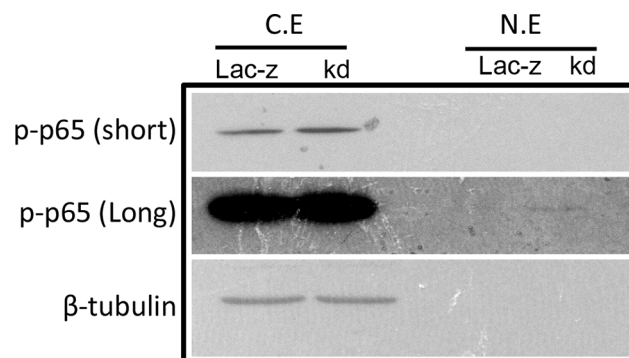

**Supplementary Figure S5:** The expression of phospho-p65 (Ser 536) in control and CFTR knockdown cells.

**Supplementary Table S1: Primer lists**

| <b>Name</b>     | <b>sequence</b>               | <b>product</b> |
|-----------------|-------------------------------|----------------|
| CFTR_F          | GTGTGATTCCACCTTCTCCAA         | 149 bp         |
| CFTR_R          | GCCTGGCACCATTAAAGAAA          | 149bp          |
| COX2_F          | CCCTTGGGTGTCAAAGGTAA          | 143 bp         |
| COX2_R          | AACTGATGCGTGAAGTGCTG          | 143 bp         |
| TNF $\alpha$ _F | TCAGCCTCTTCTCCTTCCTG          | 124 bp         |
| TNF $\alpha$ _R | GCCAGAGGGGCTGATTAGAGA         | 124 bp         |
| IL6_F           | TTCAATGAGGAGACTTGCCTG         | 349 bp         |
| IL6_R           | ACAACAACAATCTGAGGTGCC         | 349 bp         |
| IL8_F           | TCT CTT GGC AGC CTT CCT G     | 331 bp         |
| IL8_R           | GAA GTT TCA CTG GCA TCT TCA C | 331 bp         |
| IL18_F          | GCT TGA ATC TAA ATT ATC AGT C | 335 bp         |
| IL18_R          | CAA ATT GCA TCT TAT TAT CAT G | 335 bp         |
| GAPDH_F         | AGGGTCATCATCTCTGCC            | 245 bp         |
| GAPDH_R         | CCATCACGCCACAGTTTC            | 245 bp         |
| CFTR_F          | AGCTGGACCAGACCAATTTTGAGGAAA   | 554 bp         |
| CFTR_R          | CCACACGAAATGTGCCAATGCAAGTCC   | 554 bp         |
| GAPDH           | TCC CAT CAC CAT CTT CCA G     | 515 bp         |
| GAPDH           | TCC ACC ACT GAC ACG TTG       | 515 bp         |
